# Supplementary material for: CUDC-907 reverses pathological phenotype of keloid fibroblasts in vitro and in vivo via dual inhibition of PI3K/Akt/mTOR signaling and HDAC2
Source: PubMed Central journal article supplement — Int J Mol Med. 2019 Sep 23;44(5):1789–800. doi: 10.3892/ijmm.2019.4348 (PMC6777681; doi:10.3892/ijmm.2019.4348), 2019-09-23
Supplement: Supplementary_Data.pdf [file Supplementary_Data.pdf]

Figure S1. CUDC-907 treatment inhibits cells from migrating out of cultured keloid tissue explants. Representative images of tissue explants (black shadows in the upper right corners) cultured without or with different concentrations of the CUDC-907 at various time points. Magnification, x40; scale bar=250  $\mu$ m. D, day.

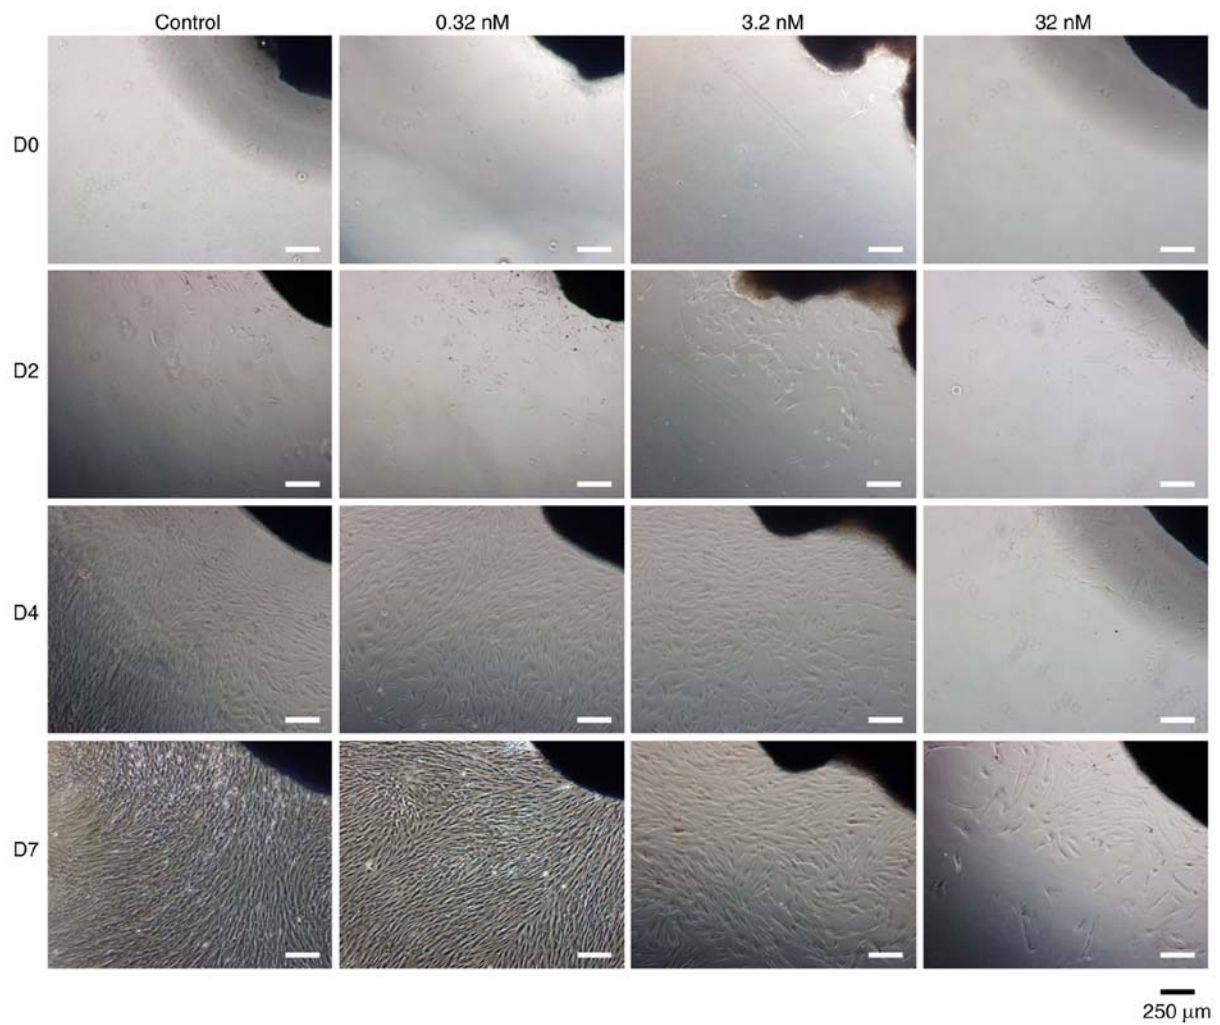

Table SI. Patients and anatomic locations of keloid or foreskin tissue samples.

| Sample no. | Sex    | Ethnic background | Age | Site(s) of specimen |
|------------|--------|-------------------|-----|---------------------|
| 1          | Male   | Asian             | 16  | Shoulder            |
| 2          | Male   | Asian             | 20  | Arms                |
| 3          | Male   | Asian             | 34  | Chest               |
| 4          | Male   | Asian             | 23  | Neck                |
| 5          | Female | Asian             | 20  | Chest               |
| 6          | Female | Asian             | 29  | Chest               |
| 7          | Female | Asian             | 11  | Abdomen             |
| 8          | Male   | Asian             | 26  | Chest               |
| 9          | Female | Asian             | 41  | Chest               |
| 10         | Female | Asian             | 56  | Shoulder            |
| 11         | Female | Asian             | 72  | Ear lobe            |
| 12         | Female | Asian             | 28  | Chest               |
| 13         | Male   | Asian             | 29  | Chest               |
| 14         | Female | Asian             | 24  | Chest               |
| 15         | Female | Asian             | 54  | Chest               |
| 16         | Male   | Asian             | 64  | Abdomen             |
| 17         | Female | Asian             | 51  | Chest               |
| 18         | Female | Asian             | 18  | Shoulder            |
| 19         | Female | Asian             | 46  | Chest               |
| 20         | Female | Asian             | 40  | Hip                 |
| 21         | Female | Asian             | 29  | Chest               |
| 22         | Female | Asian             | 23  | Ear lobe            |
| 23         | Female | Asian             | 57  | Shoulder            |
| 24         | Female | Asian             | 27  | Perineum            |
| 25         | Male   | Asian             | 32  | Chest               |
| 26         | Male   | Asian             | 58  | Abdomen             |
| 27         | Female | Asian             | 33  | Beck                |
| 28         | Male   | Asian             | 8   | Beck                |
| 29         | Male   | Asian             | 7   | Chest               |
| 30         | Female | Asian             | 23  | Perineum            |
| 31         | Female | Asian             | 13  | Chest               |
| 32         | Male   | Asian             | 32  | Shoulder            |
| 33         | Male   | Asian             | 36  | Face                |
| 34         | Male   | Asian             | 44  | Chest               |
| 35         | Male   | Asian             | 37  | Chest               |
| 36         | Male   | Asian             | 23  | Chest               |
| 37         | Male   | Asian             | 30  | Chest               |
| 38         | Male   | Asian             | 26  | Chest               |
| 39         | Female | Asian             | 27  | Shoulder            |
| 40         | Female | Asian             | 44  | Ear lobe            |
| 41         | Male   | Asian             | 27  | Chest               |
| 42         | Female | Asian             | 37  | Shoulder            |
| 43         | Female | Asian             | 42  | Chest               |
| 44         | Male   | Asian             | 60  | Shoulder            |
| 45         | Female | Asian             | 30  | Shoulder            |
| 46         | Male   | Asian             | 30  | Chest               |
| 47         | Female | Asian             | 23  | Chest               |
| 48         | Male   | Asian             | 10  | Foreskin            |
| 49         | Male   | Asian             | 32  | Foreskin            |
| 50         | Male   | Asian             | 28  | Foreskin            |
| 51         | Male   | Asian             | 8   | Foreskin            |

Table SII. Primers used in the reverse transcription quantitative polymerase chain reaction analysis.

| Gene           | Primer sequence (5'-3')  | Annealing temperature (°C) | Product size (bp) |
|----------------|--------------------------|----------------------------|-------------------|
| Collagen I     |                          |                            |                   |
| Sense          | GGCGGCCAGGGCTCCGACCC     | 58                         | 347               |
| Antisense      | AATTCCTGGTCTGGGGCACC     |                            |                   |
| Collagen III   |                          |                            |                   |
| Sense          | TGGTGTGGAGCCGCTGCCA      | 58                         | 373               |
| Antisense      | CTCAGCACTAGAATCTGTCC     |                            |                   |
| P21            |                          |                            |                   |
| Sense          | TCCAGCGACCTTCCTCATCCAC   | 58                         | 108               |
| Antisense      | TCCATAGCCTCTACTGCCACCATC |                            |                   |
| P53            |                          |                            |                   |
| Sense          | TAACAGTTCCTGCATGGGCGGC   | 58                         | 121               |
| Antisense      | AGGACAGGCACAAACACGCAC    |                            |                   |
| Cyclin B       |                          |                            |                   |
| Sense          | CCTCCGGTGTCTGCTTCTC      | 58                         | 121               |
| Antisense      | CCTGCCATGTTGATCTTCGC     |                            |                   |
| TGF- $\beta$ 1 |                          |                            |                   |
| Sense          | AAGGACCTCGGCTGGAAGTG     | 58                         | 136               |
| Antisense      | CCGGGTATGCTGGTTGTA       |                            |                   |
| MMP1           |                          |                            |                   |
| Sense          | GGAGCTGTAGATGTCCTTGGGGT  | 58                         | 139               |
| Antisense      | GCCACAACCTGCCAAATGGGCTT  |                            |                   |
| MMP2           |                          |                            |                   |
| Sense          | CAAAAACAAGAAGACATACATCTT | 58                         | 232               |
| Antisense      | GCTTCCAAACTTCACGCTC      |                            |                   |
| MMP3           |                          |                            |                   |
| Sense          | AGGACAAAGCAGGATCACAGTTG  | 58                         | 68                |
| Antisense      | CCTGGTACCCACGGAACCT      |                            |                   |
| MMP13          |                          |                            |                   |
| Sense          | AGTGGTGGTGATGAAGATGATTTG | 58                         | 144               |
| Antisense      | CATTTCTCGGAGCCTCTCAGTC   |                            |                   |
| TIMP1          |                          |                            |                   |
| Sense          | TGACATCCGGTTCGTCTACA     | 58                         | 102               |
| Antisense      | TGCAGTTTTCCAGCAATGAG     |                            |                   |
| GAPDH          |                          |                            |                   |
| Sense          | TCACCATCTTCCAGGAGCG      | 58                         | 572               |
| Antisense      | CTGCTTACCACCTTCTTGA      |                            |                   |

p21, cyclin-dependent kinase inhibitor 1; TGF- $\beta$ 1, transforming growth factor  $\beta$ 1; MMP, matrix metalloproteinase; TIMP1, tissue inhibitor of metalloproteinase 1.

Table III. Antibodies used in western blot analysis and immunohistochemical staining.

| Targets                           | Supplier                              | Catalog number | Dilution | Species reaction       | Usage |
|-----------------------------------|---------------------------------------|----------------|----------|------------------------|-------|
| Acetyl-Histone 3                  | Abcam                                 | ab8898         | 1:1,000  | Rabbit anti-human      | WB    |
| P21                               | Cell Signaling Technologies, Inc.     | 2946           | 1:2,000  | Mouse anti-human       | WB    |
| P53                               | Cell Signaling Technologies, Inc.     | 2524           | 1:1,000  | Mouse anti-human       | WB    |
| Type I collagen                   | Abcam                                 | ab90395        | 1:1,000  | Mouse anti-human       | WB    |
| Type III collagen                 | Abcam                                 | ab7778         | 1:5000   | Rabbit anti-human      | WB    |
| Akt                               | Abbkine Scientific Co., Ltd.          | Abm40272       | 1:1,000  | Mouse anti-human       | WB    |
| p-Akt                             | Abbkine Scientific Co., Ltd.          | Abm40275       | 1:1,000  | Mouse anti-human       | WB    |
| Erk                               | Cell Signaling Technologies, Inc.     | 4695           | 1:1,000  | Rabbit anti-human      | WB    |
| p-Erk                             | Cell Signaling Technologies, Inc.     | 4370           | 1:2,000  | Rabbit anti-human      | WB    |
| mTOR                              | Cell Signaling Technologies, Inc.     | 2983           | 1:1,000  | Rabbit anti-human      | WB    |
| p-mTOR                            | Cell Signaling Technologies, Inc.     | 2971           | 1:1,000  | Rabbit anti-human      | WB    |
| Smad 2/3                          | Abcam                                 | ab202445       | 1:1,000  | Rabbit anti-human      | WB    |
| p-Smad 2/3                        | Abcam                                 | ab63399        | 1:1,000  | Rabbit anti-human      | WB    |
| Cyclin B                          | Abcam                                 | ab32053        | 1:50,000 | Rabbit anti-human      | WB    |
| $\beta$ -actin                    | Abbkine Scientific Co., Ltd.          | A01010         | 1:10,000 | Mouse anti-human       | WB    |
| HRP-conjugated secondary antibody | Abbkine Scientific Co., Ltd.          | A21010; A21020 | 1:20,000 | Goat anti-mouse/rabbit | WB    |
| HDAC2                             | Abcam                                 | ab32117        | 1:100    | Rabbit anti-human      | IHC   |
| Type I Collagen                   | Wuhan Servicebio Technology Co., Ltd. | GB13022        | 1:500    | Rabbit anti-human      | IHC   |
| Type III Collagen                 | Wuhan Servicebio Technology Co., Ltd. | GB13023        | 1:300    | Rabbit anti-human      | IHC   |
| CD31                              | Wuhan Servicebio Technology Co., Ltd. | GB13063        | 1:300    | Goat anti-human        | IHC   |
| CD34                              | Wuhan Servicebio Technology Co., Ltd. | GB13013        | 1:1,000  | Goat anti-human        | IHC   |
| p-mTOR                            | Abcam                                 | ab109268       | 1:100    | Rabbit anti-human      | IHC   |
| mTOR                              | Abcam                                 | ab2732         | 1:100    | Rabbit anti-human      | IHC   |
| Akt                               | Proteintech Group, Inc.               | 60203-2-Ig     | 1:50     | Mouse anti-human       | IHC   |
| p-Akt                             | Proteintech Group, Inc.               | 66444-1-Ig     | 1:100    | Mouse anti-human       | IHC   |
| HRP-conjugated secondary antibody | Servicebio                            | GB23204        | 1:200    | Rabbit anti-goat       | IHC   |

WB, western blot analysis; IHC, immunohistochemical analysis; HPR, horseradish peroxidase; p21, cyclin-dependent kinase inhibitor 1; p, phosphorylated; HDAC2, Histone deacetylases 2; CD31, platelet endothelial cell adhesion molecule; CD34, hematopoietic progenitor cell antigen CD34.
